# Supplementary material
Source: PubMed Central journal article supplement (PMC9433599)
Supplement: mmc1.pdf [file mmc1.pdf]

## Supplementary Table: Database formulas during literature search

---

### PubMed Search Formula

#1 "post-acute COVID-19 syndrome" [MeSH Terms] OR "long-COVID" [All Fields] OR "long-COVID symptoms" [All Fields] OR "long hauler" [All Fields] OR "post-COVID-19" [All Fields] OR "post-acute COVID-19 symptoms" [All Fields] OR "COVID-19 sequelae" [All Fields]  
#2 "COVID-19 vaccines" [MeSH Terms] OR "vaccines"[MeSH Terms] OR "vaccination" [MeSH Terms] OR "SARS-CoV-2 vaccines" [All Fields]  
#3 #1 AND #2

---

### Medline / CINAHL (via EBSCO) Search Formula

#1 "post-acute COVID-19 syndrome" OR "long-COVID" OR "long-COVID symptoms" OR "long hauler" OR "post-COVID-19" OR "post-acute COVID-19 symptoms" OR "COVID-19 sequelae"  
#2 "COVID-19 vaccines" OR "vaccines" OR "vaccination" OR "SARS-CoV-2 vaccines"  
#3 #1 AND #2

---

### WOS (EMBASE) / Web of Science Search Formula

("post-acute COVID-19 syndrome" OR "long-COVID" OR "long-COVID symptoms" OR "long hauler" OR "post-COVID-19" OR "post-acute COVID-19 symptoms" OR "COVID-19 sequelae" AND ("COVID-19 vaccines" OR "vaccines" OR "vaccination" OR "SARS-CoV-2 vaccines"))

---
